# Supplementary material for: Genetic Diversity and Population Structure of Llamas (Lama glama) from the Camelid Germplasm Bank—Quimsachata
Source: PubMed Central journal article supplement (PMC7291211; doi:10.3390/genes11050541), 2020-05-12
Supplement: genes-11-00541-s001.pdf [file genes-11-00541-s001.pdf]

## Supplementary Material

Paredes et al.

**Table S1.** Primer sets used for genotyping the microsatellites.

| Microsatellite | Primer sequence (5'→3')      | Fragment size (bp) | Alignment temperature (°C) | Fluorescent dyes | References                      |
|----------------|------------------------------|--------------------|----------------------------|------------------|---------------------------------|
| Tail M13       | TGTA AAAC GACGGCCAGT         | 18                 | --                         |                  | Steffens <i>et al.</i> , 1993   |
| GLM4 F         | M13-TGAAGGAATGCAGATGAGAAGC   | 181-205            | 58                         | 6-FAM            | Bustamante <i>et al.</i> , 2003 |
| R              | TAGCTACAAACTTCCATGACAC       |                    |                            |                  |                                 |
| LAB1 F         | M13-AGAGGATCAATCCCTCTGAGAT   | 161-189            | 58                         | NED              | Bustamante <i>et al.</i> , 2003 |
| R              | ATTAGAGGCCAGTATAACAATC       |                    |                            |                  |                                 |
| LCA54 F        | M13-CACGTATACTTAAGAAGGG      | 147-157            | 58                         | 6-FAM            | Penedo <i>et al.</i> , 1999a    |
| R              | CTGCAAGTTCGGAGAGAAA          |                    |                            |                  |                                 |
| LCA65 F        | M13-TTTTTCCCCTGTGGTTGAAT     | 165-191            | 58                         | HEX              | Penedo <i>et al.</i> , 1999a    |
| R              | AACCTCAGCTGTTGTCAGGGG        |                    |                            |                  |                                 |
| LCA77 F        | M13TGTTGACTAGAGCCTTTTCTTCTTT | 233-263            | 58                         | 6-FAM            | Penedo <i>et al.</i> , 1999a    |
| R              | GGGCAAGAGAGACTGACTGG         |                    |                            |                  |                                 |
| LCA82 F        | M13-CGTGACACCAGGCTAAGTGA     | 108-124            | 58                         | 6-FAM            | Penedo <i>et al.</i> , 1999b    |
| R              | TTTCAGATGGTAGCTTTAAAAAATT    |                    |                            |                  |                                 |
| LCA83 F        | M13-A TTCACCTTGCAGTTCCTGG    | 191-221            | 58                         | HEX              | Penedo <i>et al.</i> , 1999b    |
| R              | GACTCCAAGCAGGACGAGAC         |                    |                            |                  |                                 |
| LCA85 F        | M13-CACGTATACAGACCAGAGAAGGG  | 194-210            | 58                         | 6-FAM            | Penedo <i>et al.</i> , 1999b    |
| R              | CTGCAAGGGATTACGGAGAA         |                    |                            |                  |                                 |
| LGU76 F        | M13-TTCCTTCCATTGAAGCAGGT     | 233-261            | 58                         | 6-FAM            | Sarno <i>et al.</i> , 2000      |
| R              | TGAGATGCACTGCTTTGGATA        |                    |                            |                  |                                 |
| YWLL08 F       | M13-ATCAAGTTTGAGGTGCTTTCC    | 126-188            | 58                         | 6-FAM            | Lang <i>et al.</i> , 1996       |
| R              | CCATGGCATTGTGTTGAAGAC        |                    |                            |                  |                                 |
| YWLL44 F       | M13-CTCAACAATGCTAGACCTTGG    | 81-130             | 58                         | HEX              | Lang <i>et al.</i> , 1996       |

|        |   |                          |         |    |     |                              |
|--------|---|--------------------------|---------|----|-----|------------------------------|
|        | R | GAGAACACAGGCTGGTGAATA    |         |    |     |                              |
| YWLL59 | F | M13-TGTGCAGGAGTTAGGTGTA  | 96-136  | 58 | NED | Lang <i>et al.</i> , 1996    |
|        | R | CCATGTCTCTGAAGCTCTGGA    |         |    |     |                              |
| VOLP03 | F | M13-AGACGGTTGGGAAGGTGGTA | 129-169 | 56 | NED | Obreque <i>et al.</i> , 1998 |
|        | R | CGACAGCAAGGCACAGGA       |         |    |     |                              |

**Table S2.** Existence and Frequencies of null alleles found in each microsatellite marker analyzed with the software Micro Checker 2.2.3 and CERVUS 3.0.3, respectively.

| Locus  | Global (F0) | Q'ara | Ch'aku |
|--------|-------------|-------|--------|
| GLM4   | 0.035       | no    | yes    |
| LAB1   | 0.029       | no    | no     |
| LCA54  | 0.028       | no    | no     |
| LCA65  | 0.031       | no    | no     |
| LCA77  | -0.003      | no    | no     |
| LCA82  | 0.133       | yes   | yes    |
| LCA83  | 0.009       | no    | no     |
| LCA85  | 0.046       | yes   | yes    |
| LGU76  | 0.022       | no    | no     |
| YWLL08 | 0.02        | no    | no     |
| YWLL44 | 0.016       | no    | no     |
| YWLL59 | 0.062       | yes   | yes    |
| VOLP03 | 0.016       | no    | no     |

\*F0, Frequencies of null alleles from the global population

**Table S3.** Analysis of molecular variance (AMOVA) between the subpopulations of llamas Ch'aku and Q'ara.

| <b>Source of variation</b>              | <b>Degree of freedom</b> | <b>Sum of Squares</b> | <b>Variance Components</b> | <b>Percentage of Variance (%)</b> |
|-----------------------------------------|--------------------------|-----------------------|----------------------------|-----------------------------------|
| Between populations                     | 1                        | 12.845                | 0.03837                    | 1.02                              |
| Between individuals between populations | 249                      | 970.878               | 0.1886                     | 5.03                              |
| Within the population                   | 251                      | 884                   | 3.52191                    | 93.95                             |
